# Supplementary material for: Joint impact of atmospheric SO2and NH3on the formation of nanoparticles from photo-oxidation of a typical biomass burning compound
Source: Royal Society of Chemistry journal article supplement (doi:10.1039/d0en00520g), 2020-01-01
Supplement: d0en00520g1.pdf [file d0en00520g1.pdf]

*Electronic Supplementary Information (ESI)*

**Joint impacts of atmospheric SO<sub>2</sub> and NH<sub>3</sub> on the formation  
of nanoparticles from photooxidation of a typical biomass  
burning compound**

*Xiaotong Jiang, Chen Lv, Bo You, Zhiyi Liu, Xinfeng Wang, Lin Du\**

Environment Research Institute, Shandong University, Qingdao, 266237, China

\*Correspondence author: Lin Du ([lindu@sdu.edu.cn](mailto:lindu@sdu.edu.cn))

**Contents of this file**

Number of pages: 8

1. Page S2-S6: Figure S1 to S7
2. Page S7-S8: Table S1-S2

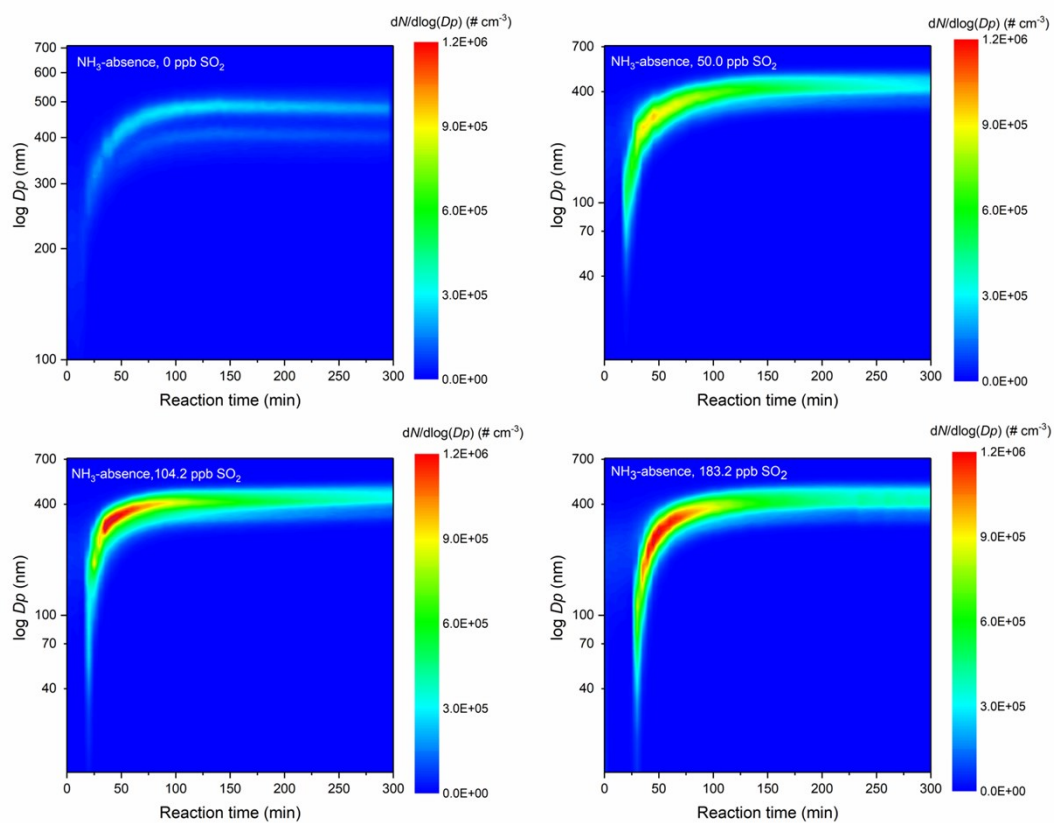

**Figure S1.** Time evolution of the suspended particle number size distribution during the 3-MF photooxidation under various  $\text{SO}_2$  conditions in the presence of seed particles under  $\text{NH}_3$ -presence conditions.

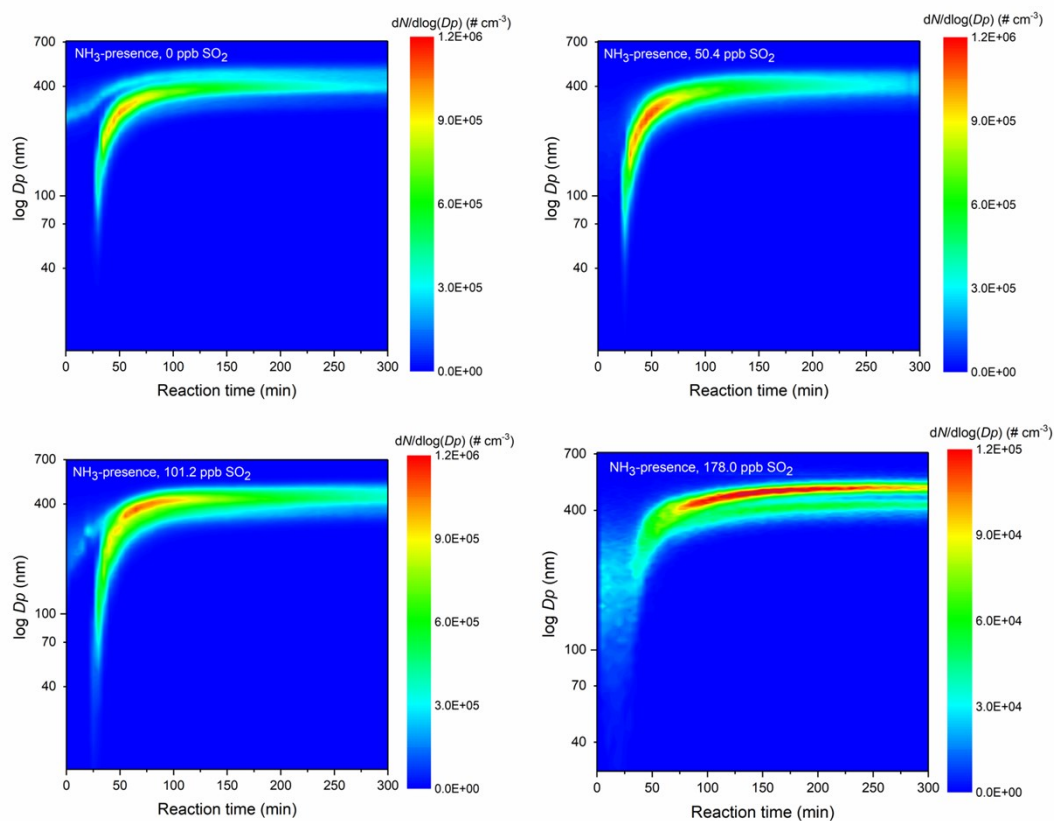

**Figure S2.** Time evolution of the suspended particle number size distribution during the 3-MF photooxidation under various  $\text{SO}_2$  conditions in the presence of  $\text{NH}_3$  and  $(\text{NH}_4)_2\text{SO}_4$  seeds.

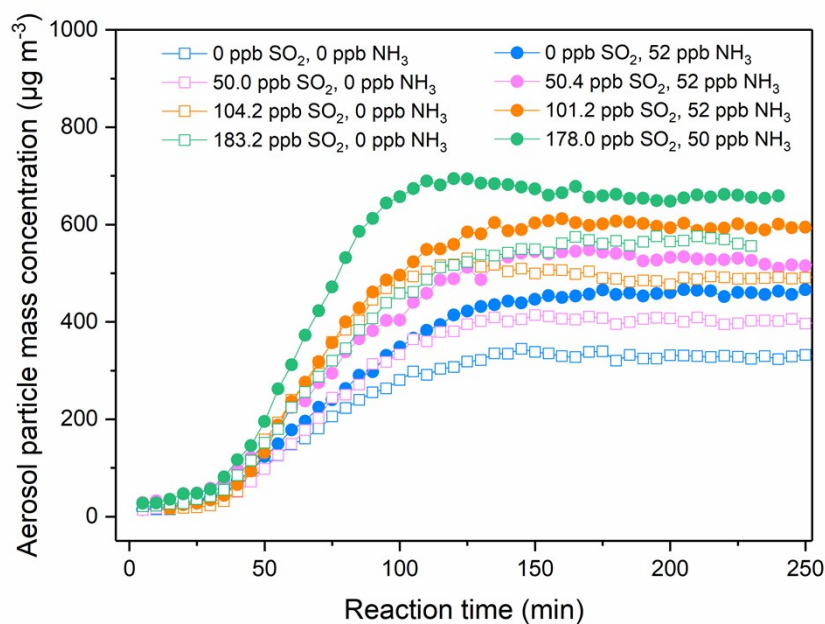

**Figure S3.** Secondary aerosol formation with different  $\text{SO}_2$  concentrations in the 3-MF photooxidation under  $\text{NH}_3$ -absence (square) and  $\text{NH}_3$ -presence (solid circle) conditions.

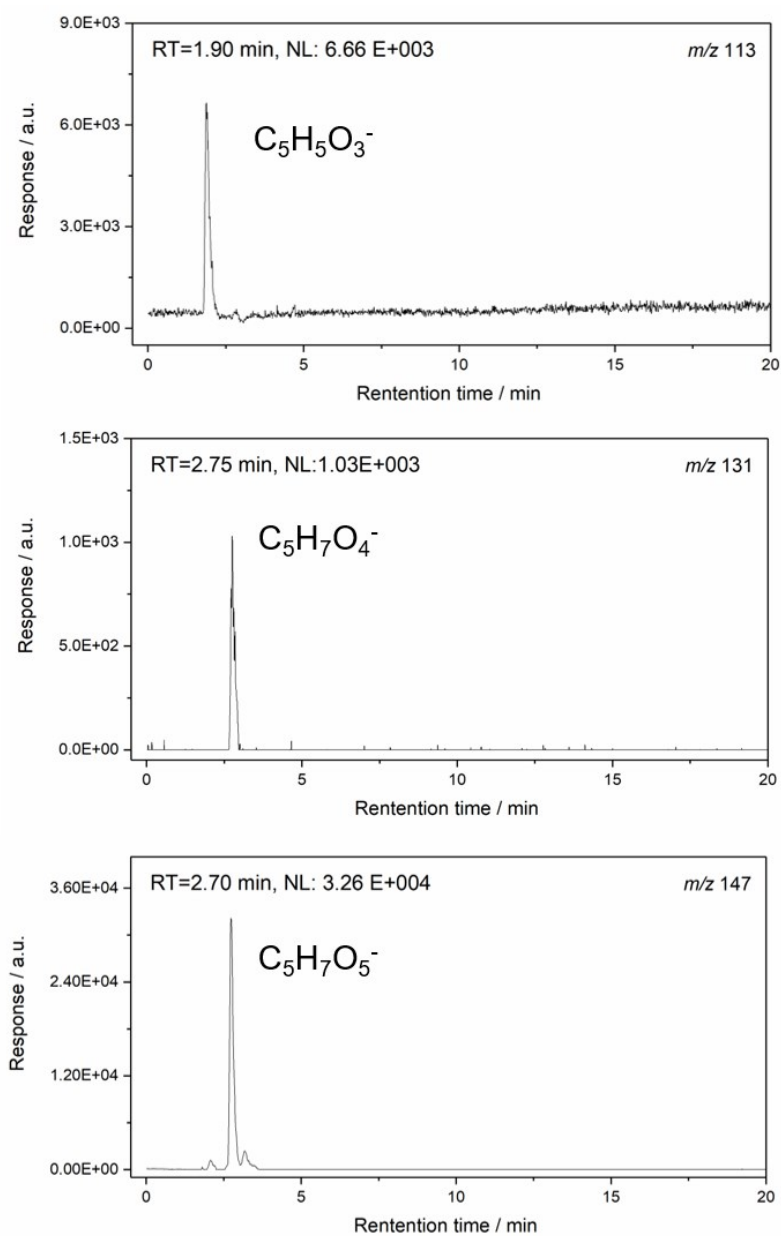

**Figure S4.** Extracted ion chromatographic profiles for aerosol products identified in experiments MF/SA using HR-MS.

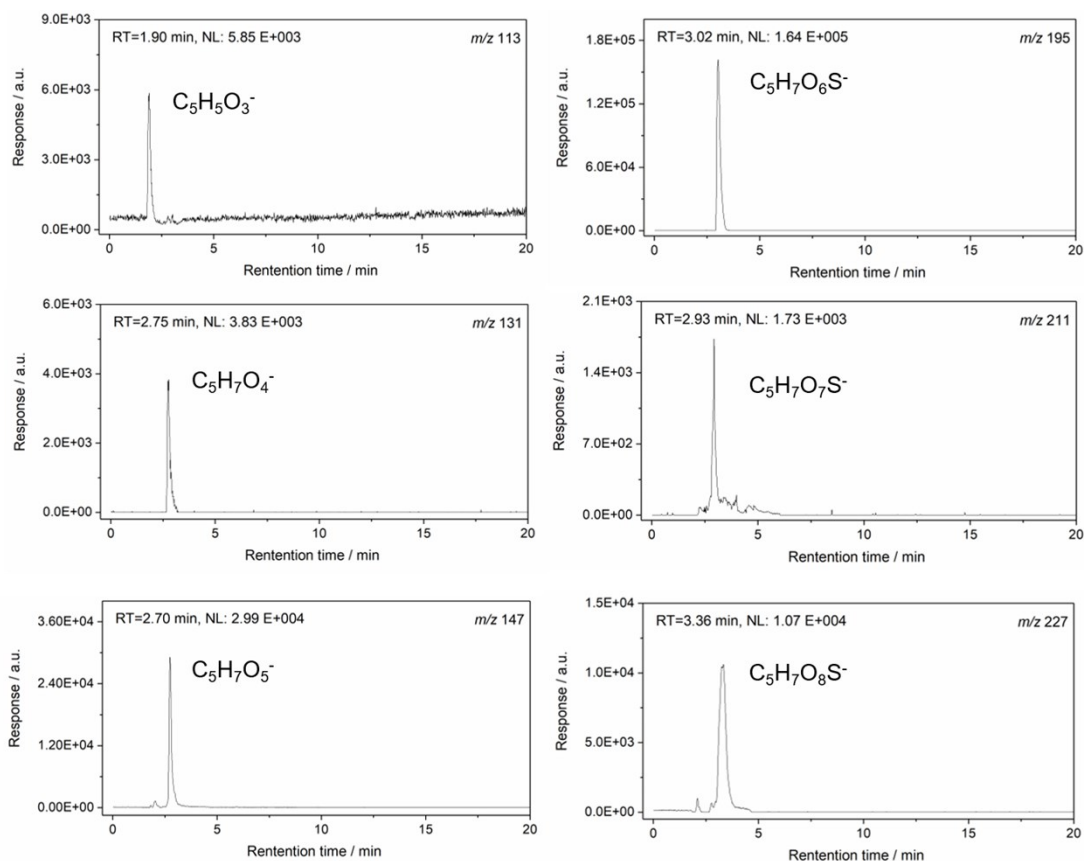

**Figure S5.** Extracted ion chromatographic profiles for aerosol products identified in experiments MF/SA/S using HR-MS.

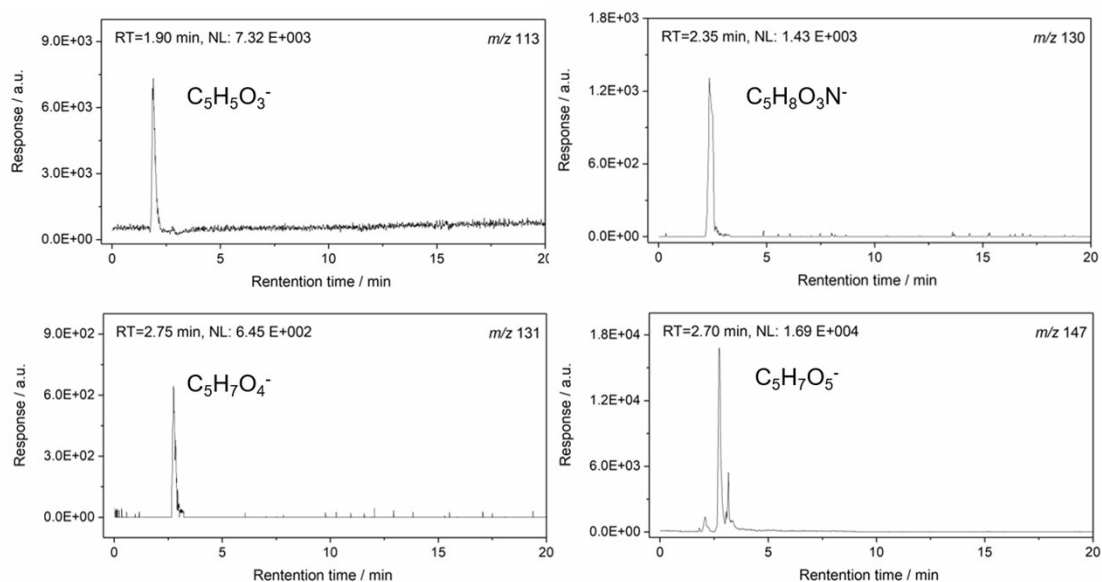

**Figure S6.** Extracted ion chromatographic profiles for aerosol products identified in experiments MF/SA/A using HR-MS.

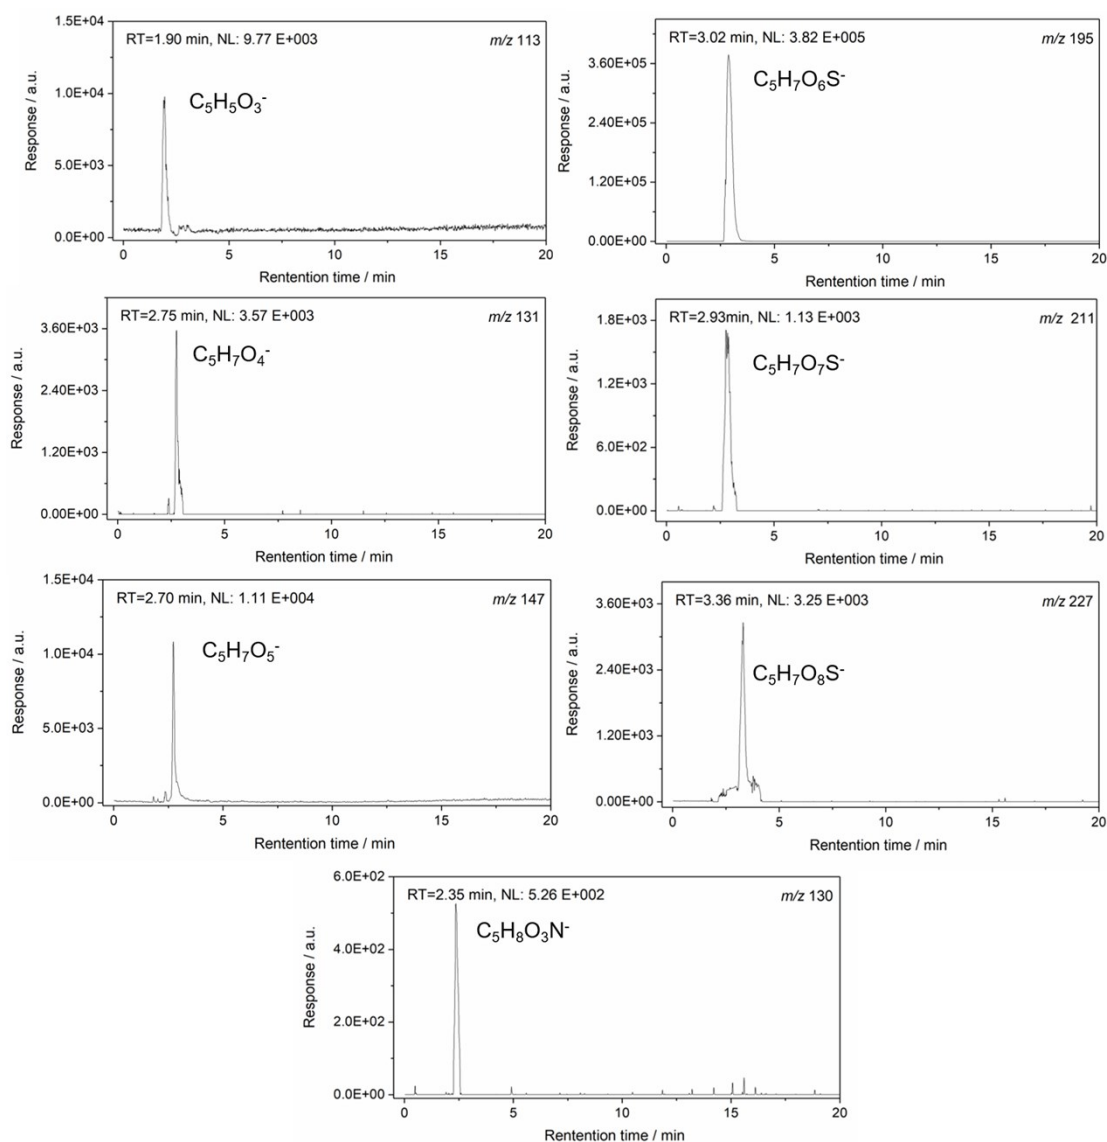

**Figure S7.** Extracted ion chromatographic profiles for aerosol products identified in experiments MF/SA/S/A using HR-MS.

**Table S1** Parameters used for the calculation of SOA yield.

| Experiment No.          | $\Delta[3\text{-MF}]$<br>( $\mu\text{g m}^{-3}$ ) | TSP<br>( $\mu\text{g m}^{-3}$ ) | $\text{NH}_4^+$<br>( $\mu\text{g m}^{-3}$ ) | $\text{SO}_4^{2-}$<br>( $\mu\text{g m}^{-3}$ ) |
|-------------------------|---------------------------------------------------|---------------------------------|---------------------------------------------|------------------------------------------------|
| MF/SA                   | 2894                                              | 312.63                          | 0                                           | 0                                              |
| MF/SA/S                 | 2967                                              | 410.41                          | 0                                           | 15.3                                           |
| MF/SA/A                 | 3357                                              | 499.63                          | 8.5                                         | 0                                              |
| MF/SA/S/A               | 3418                                              | 567.93                          | 12.4                                        | 28.4                                           |
| $\text{NH}_3$ -absence  | 2942                                              | 473.3                           | 0                                           | 0                                              |
|                         | 3017                                              | 536.6                           | 0                                           | 18.6                                           |
|                         | 3562                                              | 662.65                          | 0                                           | 22.9                                           |
|                         | 3438                                              | 687.54                          | 0                                           | 27.2                                           |
| $\text{NH}_3$ -presence | 1983                                              | 158.72                          | 13.5                                        | 0                                              |
|                         | 2054                                              | 193.98                          | 16.7                                        | 20.4                                           |
|                         | 1676                                              | 214.03                          | 23.6                                        | 29.7                                           |
|                         | 1835                                              | 297.38                          | 25.8                                        | 35.1                                           |

**Table S2.** Ion peaks and ion formula as well as the proposed structures observed in UHPLC-ESI-ISQ EC-MS.

| Ion mode          | No. | Mass ( <i>m/z</i> ) | Ion formula    | Proposed structure |
|-------------------|-----|---------------------|----------------|--------------------|
| Negative ion mode | 1   | 113                 | $C_5H_5O_3^-$  |                    |
|                   | 2   | 130                 | $C_5H_8O_3N^-$ |                    |
|                   | 3   | 131                 | $C_5H_7O_4^-$  |                    |
|                   | 4   | 147                 | $C_5H_7O_5^-$  |                    |
|                   | 5   | 195                 | $C_5H_7O_6S^-$ |                    |
|                   | 6   | 211                 | $C_5H_7O_7S^-$ |                    |
|                   | 7   | 227                 | $C_5H_7O_8S^-$ |                    |
